# Supplementary material for: Global trends in research of pseudomyxoma peritonei: a bibliometric and visualization analysis
Source: Frontiers journal article supplement (doi:10.3389/fonc.2024.1323796), 2024-02-08
Supplement: Image_1.pdf [file Image_1.pdf]

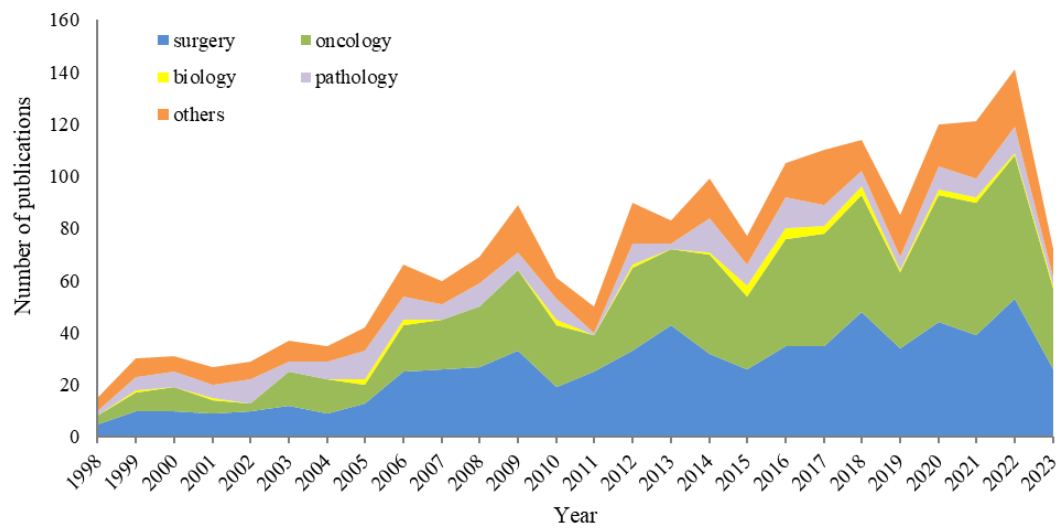

Supplementary fig. 1. Number of publications by categories
